# Supplementary material for: The MyoD1 Promoted Muscle Differentiation and Generation by Activating CCND2 in Guanling Cattle
Source: Animals (Basel). 2022 Sep 26;12(19):2571. doi: 10.3390/ani12192571 (PMC9559206; doi:10.3390/ani12192571)
Supplement: Supplementary file 1 [file animals-12-02571-s001.zip › animals-1832941-supplementary.pdf]

## Supplementary

### 1. *MyoD1* gene knockouts effect

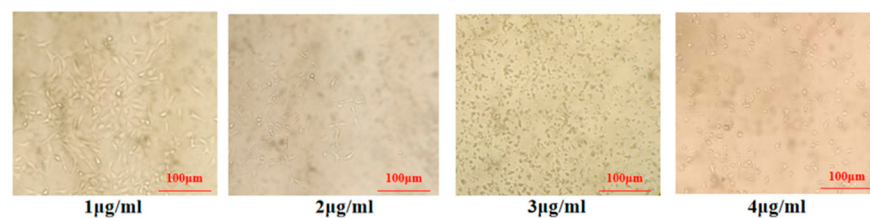

**Figure S1.** MDBK cell survival in the presence of the indicated concentrations of puromycin after 48 h.

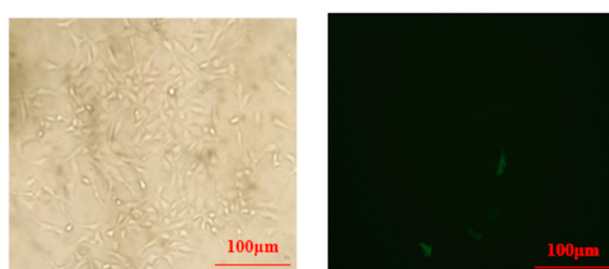

**Figure S2.** Lipofectamine transfection of GFP control plasmid pX458. Right panel, light micrograph of transfected cells; Left panel, fluorescent microscopy using phase contrast.

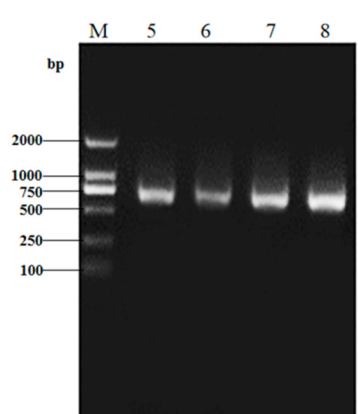

**Figure S3.** PCR amplification of genomic DNA taken from 4 CRISPR targets in MDBK cells. 5,6,7,8: Respectively represent the gel band size of g5,g6, g7 and g8.

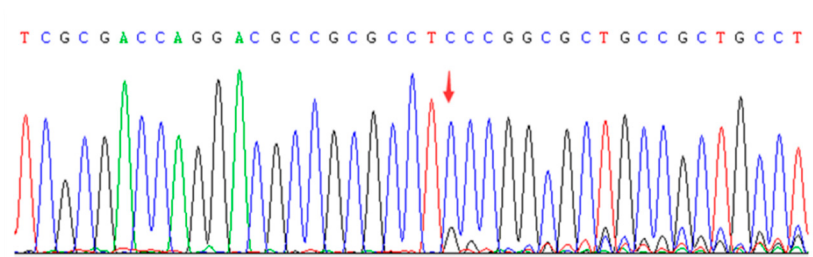

**Figure S4.** Analysis of gRNA target sequences.

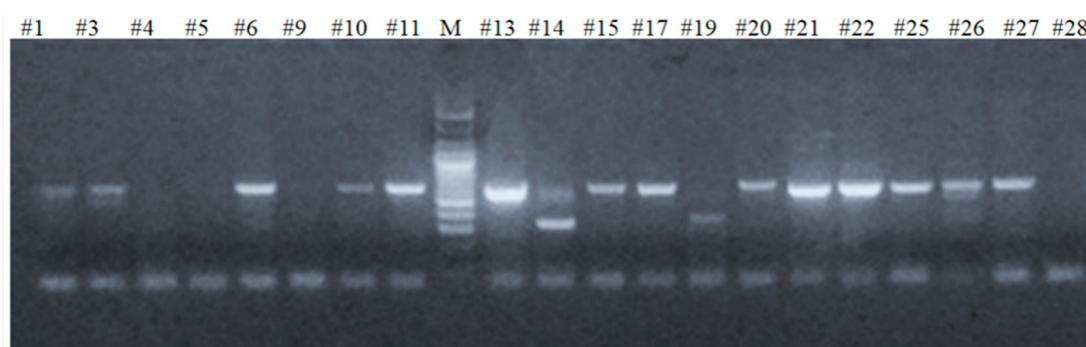

**Figure S5.** Gel electrophoresis of PCR amplicons generated from *MyoD1* gene disruptions in cell lines identified using limiting dilution. M, DNA marker (Takara, Dalian, China).

## 2. GO Functional annotation of DEGs

**Table S1.** GO enrichment analysis of DEGs.

|                           | GO ontology                        | Cluster Frequency | Genome Frequency of Use | Corrected <i>p</i> -Value |
|---------------------------|------------------------------------|-------------------|-------------------------|---------------------------|
| <b>Cellular component</b> | Plasma membrane                    | 19.6%             | 10.7%                   | 7.51 E-10                 |
|                           | extracellular matrix               | 5.4%              | 1.6%                    | 8.77 E-8                  |
|                           | intrinsic component of membrane    | 38.0%             | 30.6%                   | 0.00694                   |
|                           | Membrane                           | 51.0%             | 43.4%                   | 0.01055                   |
|                           | Extracellular region part          | 13.0%             | 7.2%                    | 0.0000166                 |
| <b>Molecular function</b> | integrin binding                   | 2.4%              | 0.5%                    | 0.0000431                 |
|                           | Signaling receptor binding         | 11.7%             | 6.8%                    | 0.00092                   |
|                           | Cell adhesion molecule binding     | 3.1%              | 0.9%                    | 0.00063                   |
|                           | Calcium ion binding                | 6.3%              | 3.3%                    | 0.02028                   |
|                           | transmembrane transporter activity | 8.7%              | 5.4%                    | 0.10275                   |
| <b>Biological process</b> | cell differentiation               | 19.9%             | 13.9%                   | 0.02449                   |
|                           | striated muscle tissue development | 2.5%              | 1.3%                    | 1                         |
|                           | muscle structure development       | 3.7%              | 1.9%                    | 1                         |
|                           | muscle cell differentiation        | 2.1%              | 1.0%                    | 1                         |
|                           | muscle organ development           | 2.4%              | 1.1%                    | 1                         |
